# Supplementary material for: Technical feasibility and uptake of tailored mobile health support for people with HIV in Lesotho
Source: Research Square preprint supplement (doi:10.21203/rs.3.rs-8214790/v1), 2025-12-11

**Supplementary information:**

**A.**

**1a**

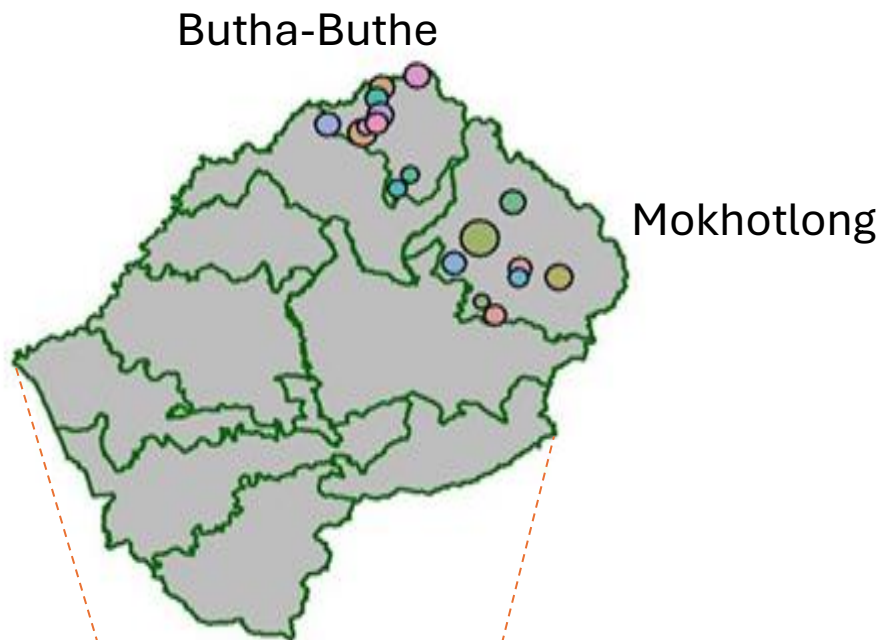

**2b**

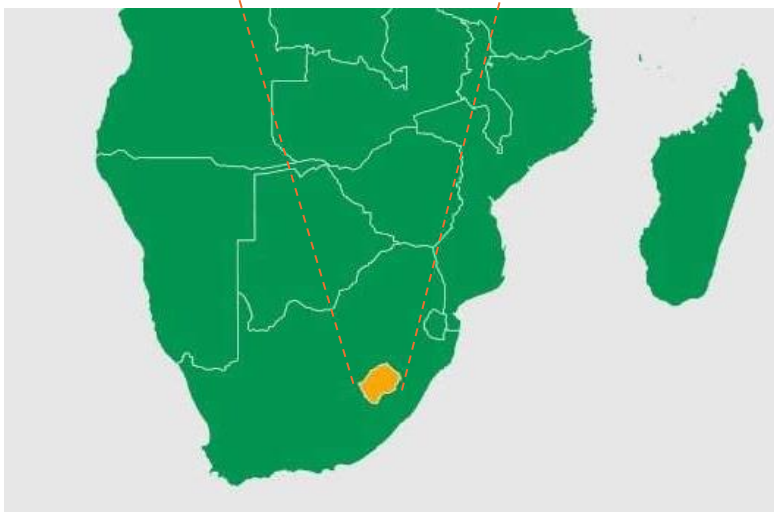

**Figure 1a:** Map of Lesotho showing all 18 VITAL clinics in 2 northern districts of Butha-Buthe and Mokhotlong. **2b** shows map of Lesotho in relation to the Southern Africa Region.

### **B.SMS Application:**

Only two cellphone service providers in Lesotho Vodacom and Econet were programmed for communication with participants on the dialing code (+266 XXXXXXXX). Users on other mobile networks like South Africa Vodacom (+27 XXXXXXXXXX) phone communication would fail and messages would not go through.

**C. Remote enhanced adherence counselling:** Reasons for missing ART from participants as recorded by the VITAL study nurse.

| <i>Missed ART reason</i>      | <i>Frequency</i> |
|-------------------------------|------------------|
| <i>Travelling reasons</i>     | <i>4</i>         |
| <i>Forgetting to take ART</i> | <i>2</i>         |
| <i>Depression</i>             | <i>1</i>         |
| <i>Other</i>                  | <i>1</i>         |

### **D. Automated tuberculosis symptoms screening call flow chart:**

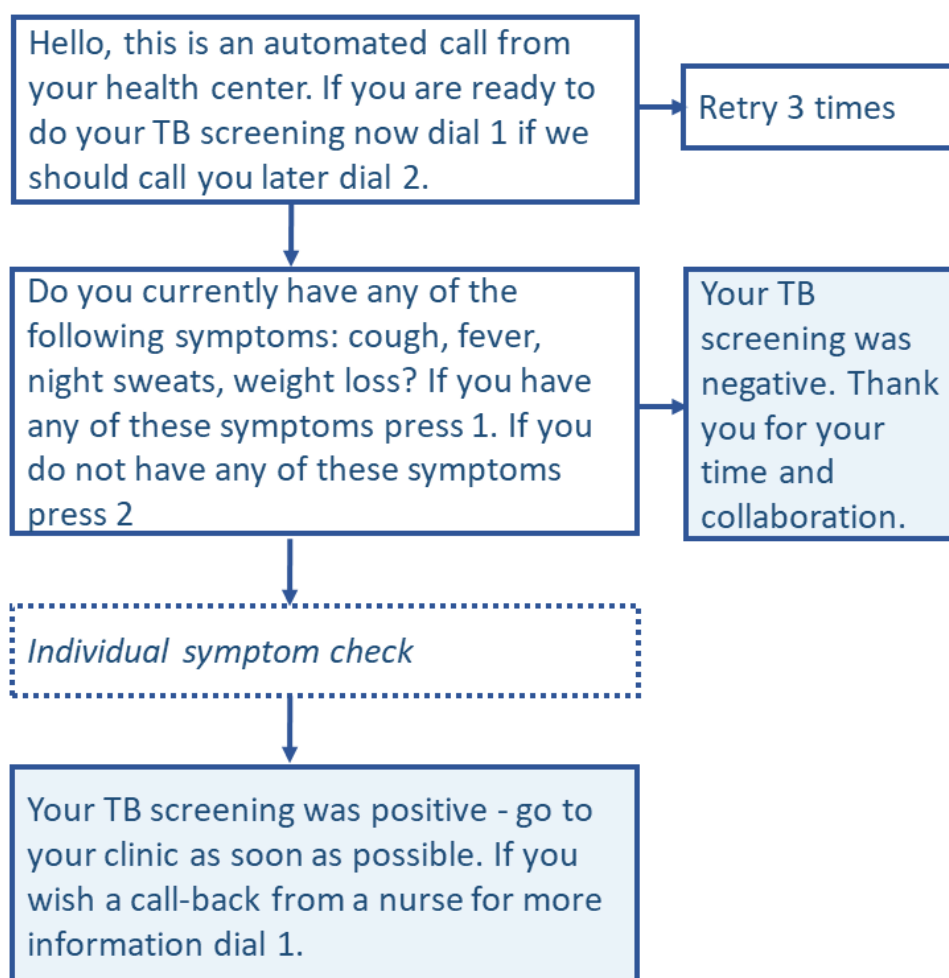

Supplement: Supplementary file 1 [file d50088ae4fe860b2dcf60e0a.pdf]
